# Supplementary material for: Induction of a torpor-like hypothermic and hypometabolic state in rodents by ultrasound
Source: PubMed Central journal article supplement (PMC10229429; doi:10.1038/s42255-023-00804-z), 2023-05-25
Supplement: 42255_2023_804_MOESM1_ESM.pdf [file 42255_2023_804_MOESM1_ESM.pdf]

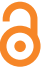

---

# Induction of a torpor-like hypothermic and hypometabolic state in rodents by ultrasound

---

In the format provided by the authors and unedited

---

## Supplementary Fig. 1.

Flow cytometry gating strategy for the control group (US<sup>-</sup>)

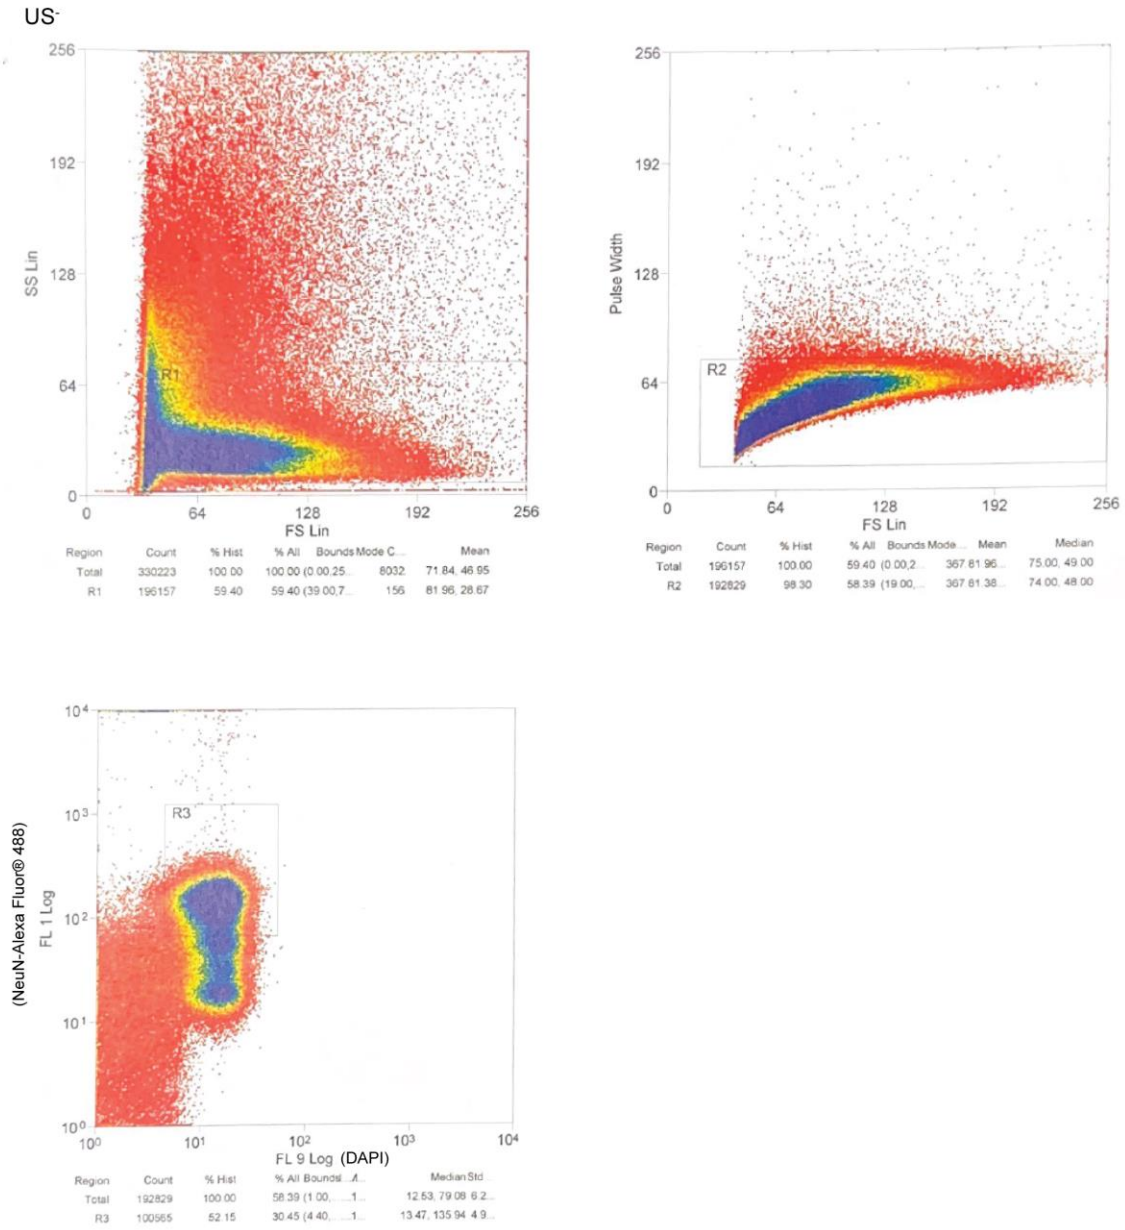

# Flow cytometry gating strategy for the ultrasound stimulation group (US<sup>+</sup>)

US<sup>+</sup>

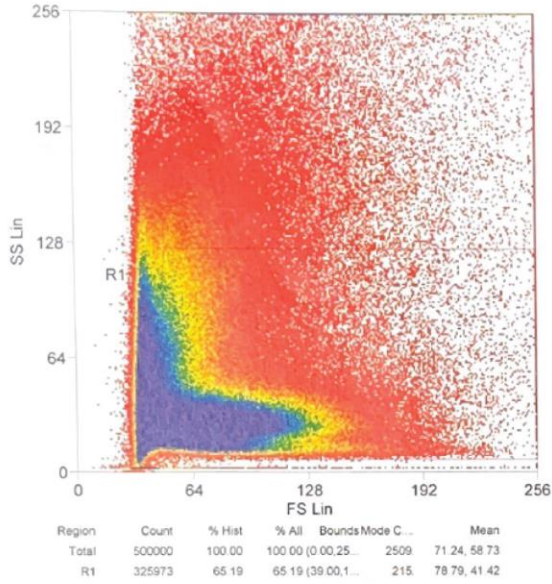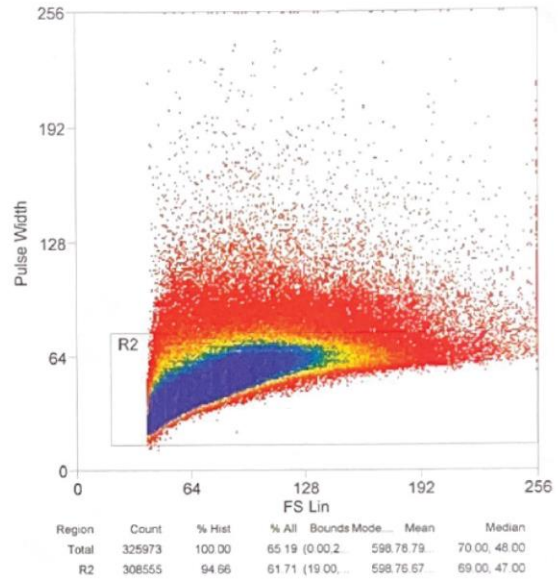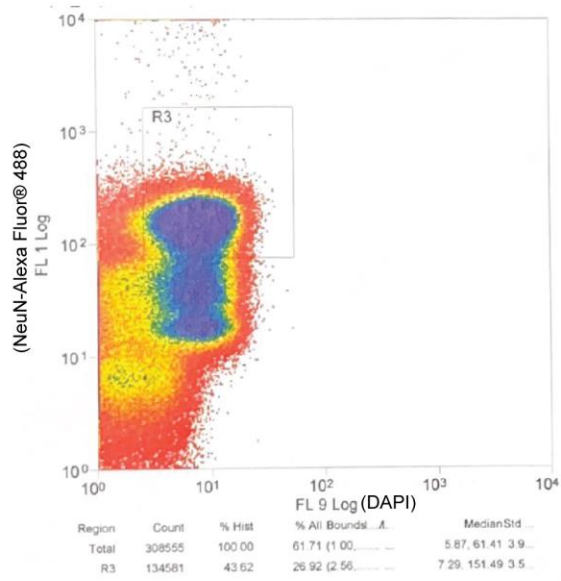

**Video S1.** Representative infrared thermal imaging video of a mouse receiving noninvasive ultrasound stimulation at the POA.
